# Supplementary material for: First principles study on structural, electronic and optical properties of HfS2(1−x)Se2x and ZrS2(1−x)Se2x ternary alloys
Source: Royal Society of Chemistry journal article supplement (doi:10.1039/d2ra01905a), 2022-01-01
Supplement: d2ra01905a1.pdf [file d2ra01905a1.pdf]

## Electronic Supplementary Material (ESI) for RSC Advances

### First Principles Study on Structural, Electronic and Optical Properties of $\text{HfS}_{2(1-x)}\text{Se}_{2x}$ and $\text{ZrS}_{2(1-x)}\text{Se}_{2x}$ Ternary Alloys

Mohammadreza Razeghizadeh <sup>a</sup>, Mahdi Pourfath <sup>a,b,c,\*</sup>

<sup>a</sup> School of Electrical and Computer Engineering, University of Tehran, Tehran 14395-515, Iran.

<sup>b</sup> Super Computing Institute, University of Tehran, Tehran 14398-17435, Iran.

<sup>c</sup> Institute for Microelectronics, Technische Universität Wien, Vienna A-1040, Austria.

\* Corresponding author. E-mail: [pourfath@ut.ac.ir](mailto:pourfath@ut.ac.ir), [pourfath@iue.tuwien.ac.at](mailto:pourfath@iue.tuwien.ac.at)

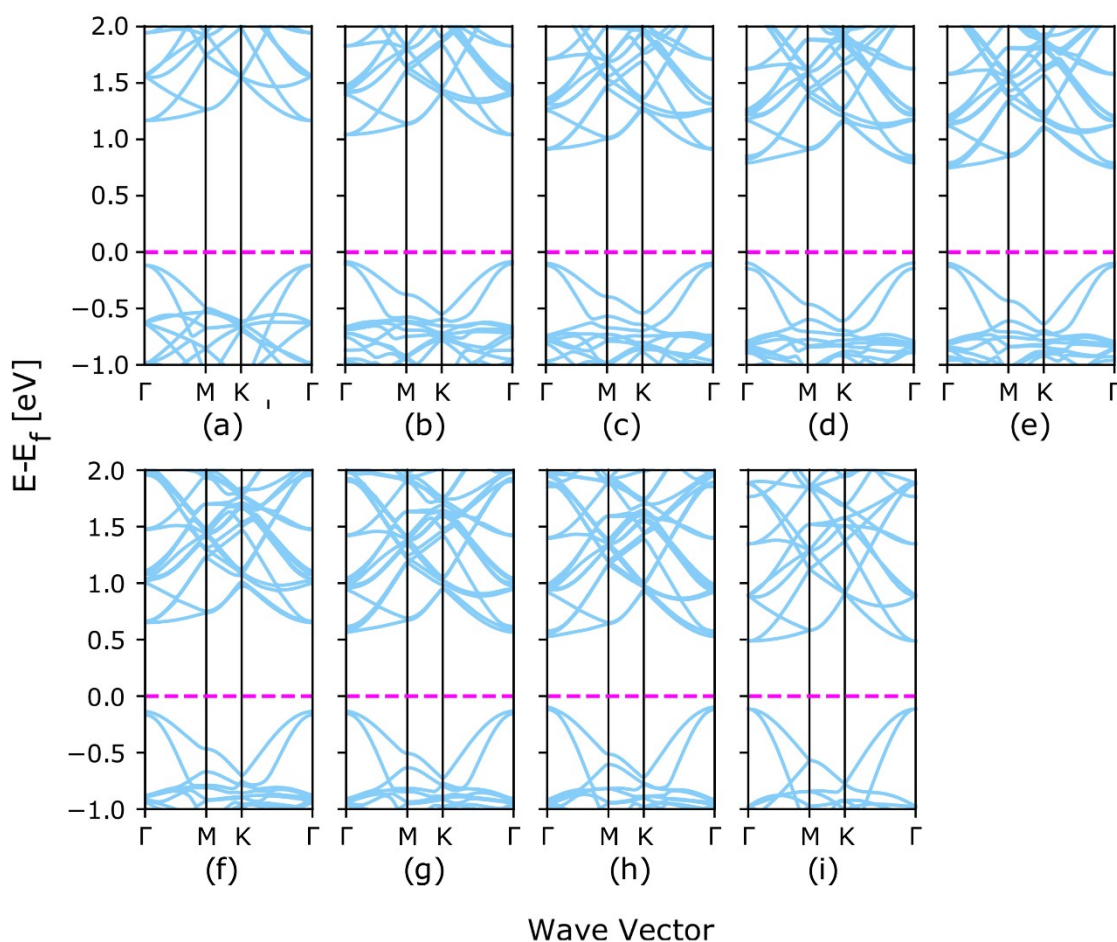

Fig. S1 Folded electronic band-structures of (a)  $\text{Hf}_{16}\text{S}_{32}$  (b)  $\text{Hf}_{16}\text{S}_{28}\text{Se}_4$  (c)  $\text{Hf}_{16}\text{S}_{24}\text{Se}_8$  (d)  $\text{Hf}_{16}\text{S}_{20}\text{Se}_{12}$  (e)  $\text{Hf}_{16}\text{S}_{16}\text{Se}_{16}$  (f)  $\text{Hf}_{16}\text{S}_{12}\text{Se}_{20}$  (g)  $\text{Hf}_{16}\text{S}_8\text{Se}_{24}$  (h)  $\text{Hf}_{16}\text{S}_4\text{Se}_{28}$  (i)  $\text{Hf}_{16}\text{Se}_{32}$  in a  $4 \times 4 \times 1$  supercell.

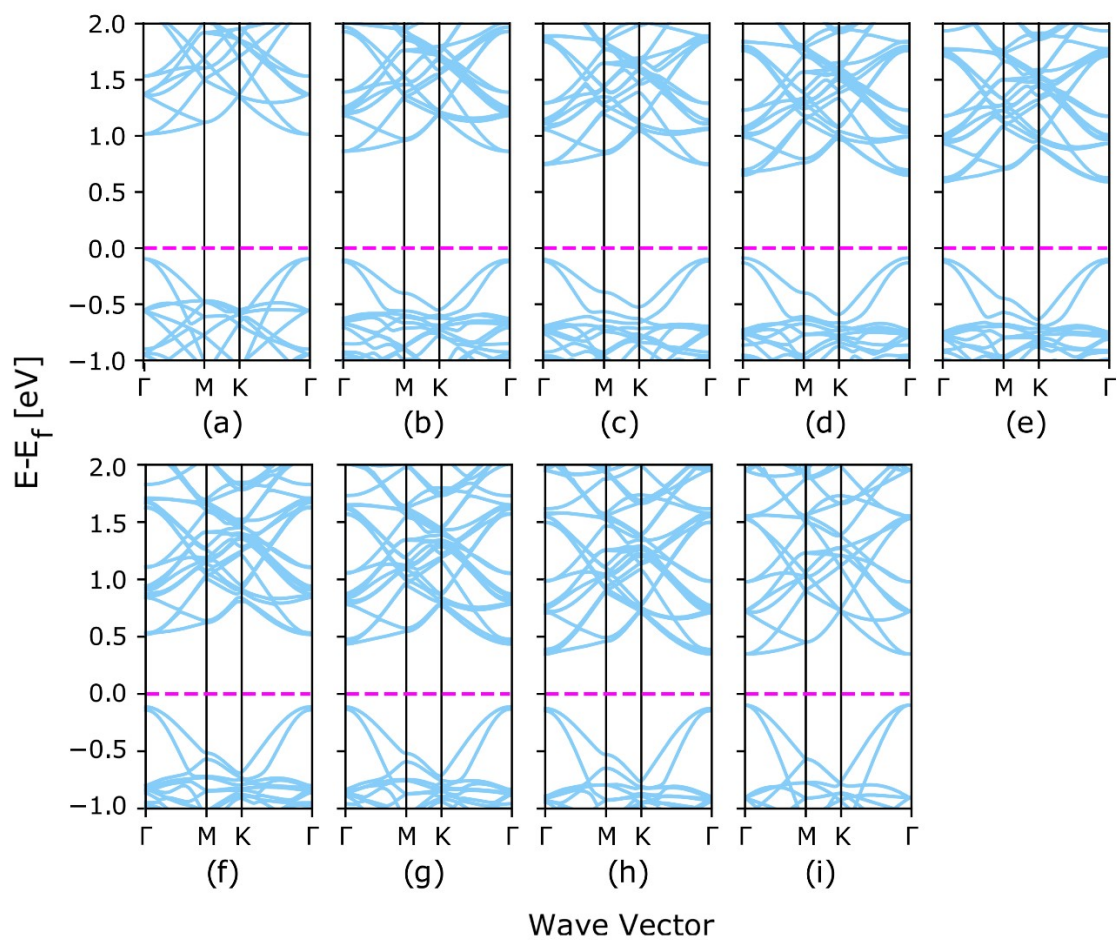

Fig. S2 Folded electronic band-structures of (a)  $\text{Zr}_{16}\text{S}_{32}$  (b)  $\text{Zr}_{16}\text{S}_{28}\text{Se}_4$  (c)  $\text{Zr}_{16}\text{S}_{24}\text{Se}_8$  (d)  $\text{Zr}_{16}\text{S}_{20}\text{Se}_{12}$  (e)  $\text{Zr}_{16}\text{S}_{16}\text{Se}_{16}$  (f)  $\text{Zr}_{16}\text{S}_{12}\text{Se}_{20}$  (g)  $\text{Zr}_{16}\text{S}_8\text{Se}_{24}$  (h)  $\text{Zr}_{16}\text{S}_4\text{Se}_{28}$  (i)  $\text{Zr}_{16}\text{Se}_{32}$  in a  $4 \times 4 \times 1$  supercell.

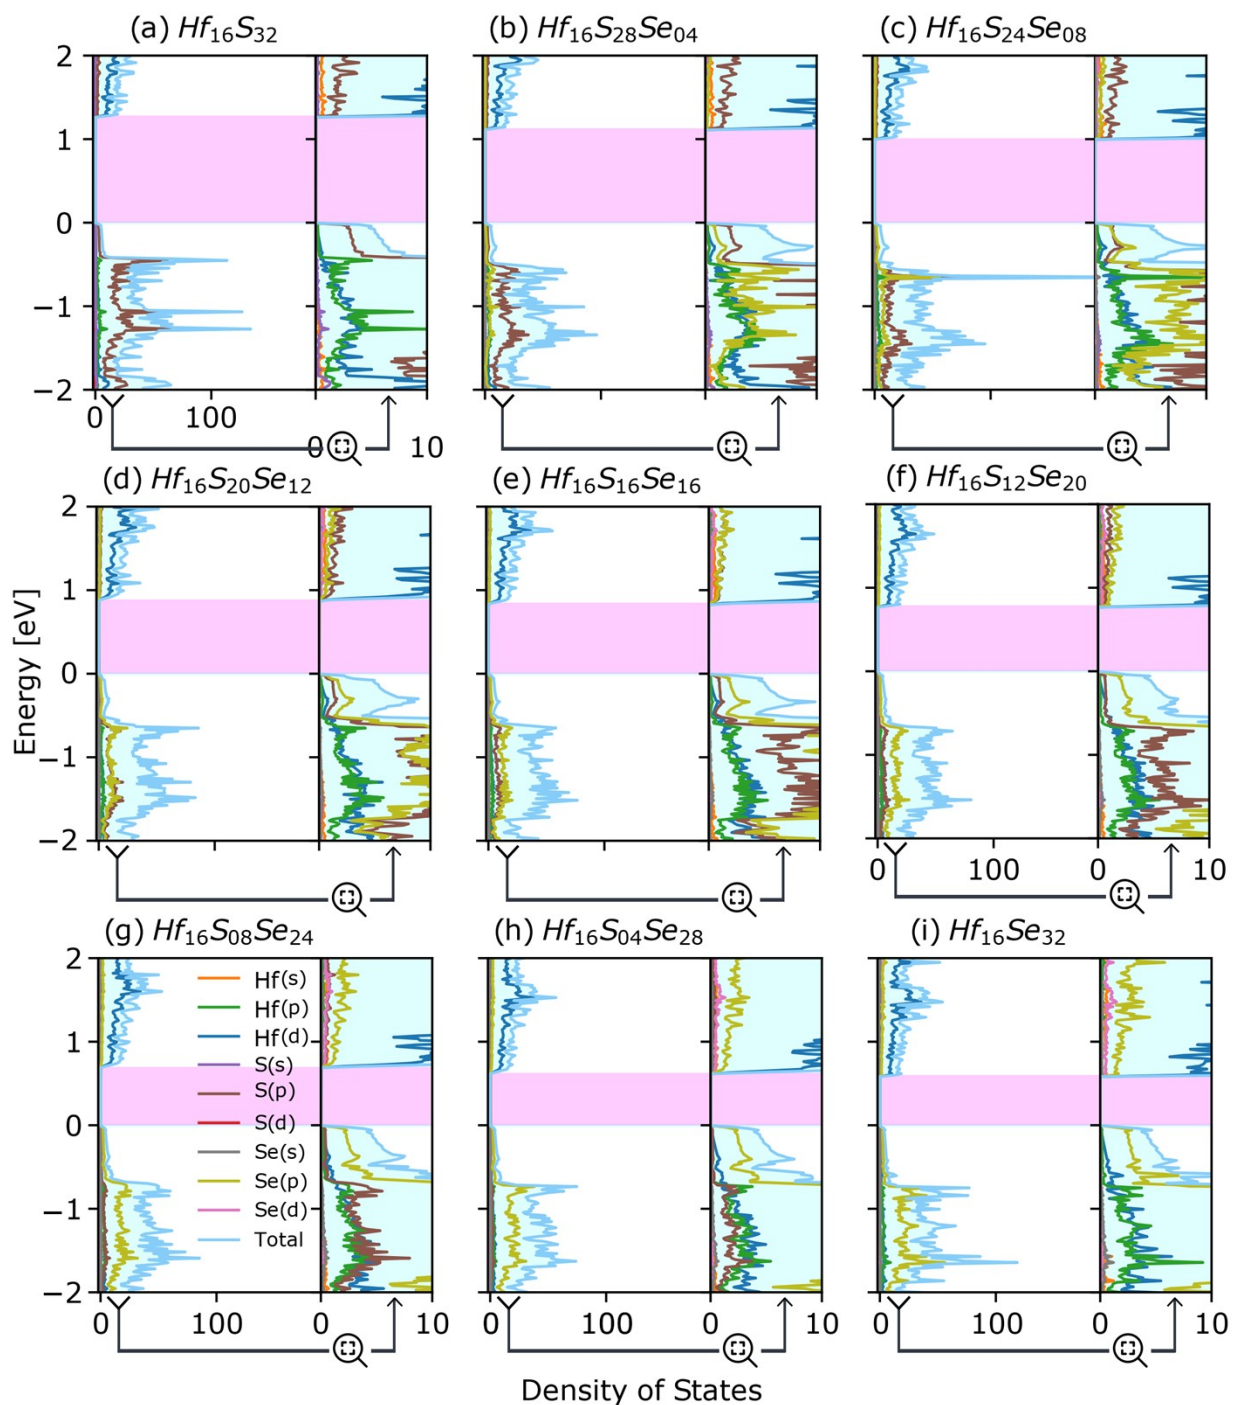

Fig. S3 The total and partial density of states (DOS) of (a)  $Hf_{16}S_{32}$  (b)  $Hf_{16}S_{28}Se_4$  (c)  $Hf_{16}S_{24}Se_8$  (d)  $Hf_{16}S_{20}Se_{12}$  (e)  $Hf_{16}S_{16}Se_{16}$  (f)  $Hf_{16}S_{12}Se_{20}$  (g)  $Hf_{16}S_8Se_{24}$  (h)  $Hf_{16}S_4Se_{28}$  (i)  $Hf_{16}Se_{32}$ .

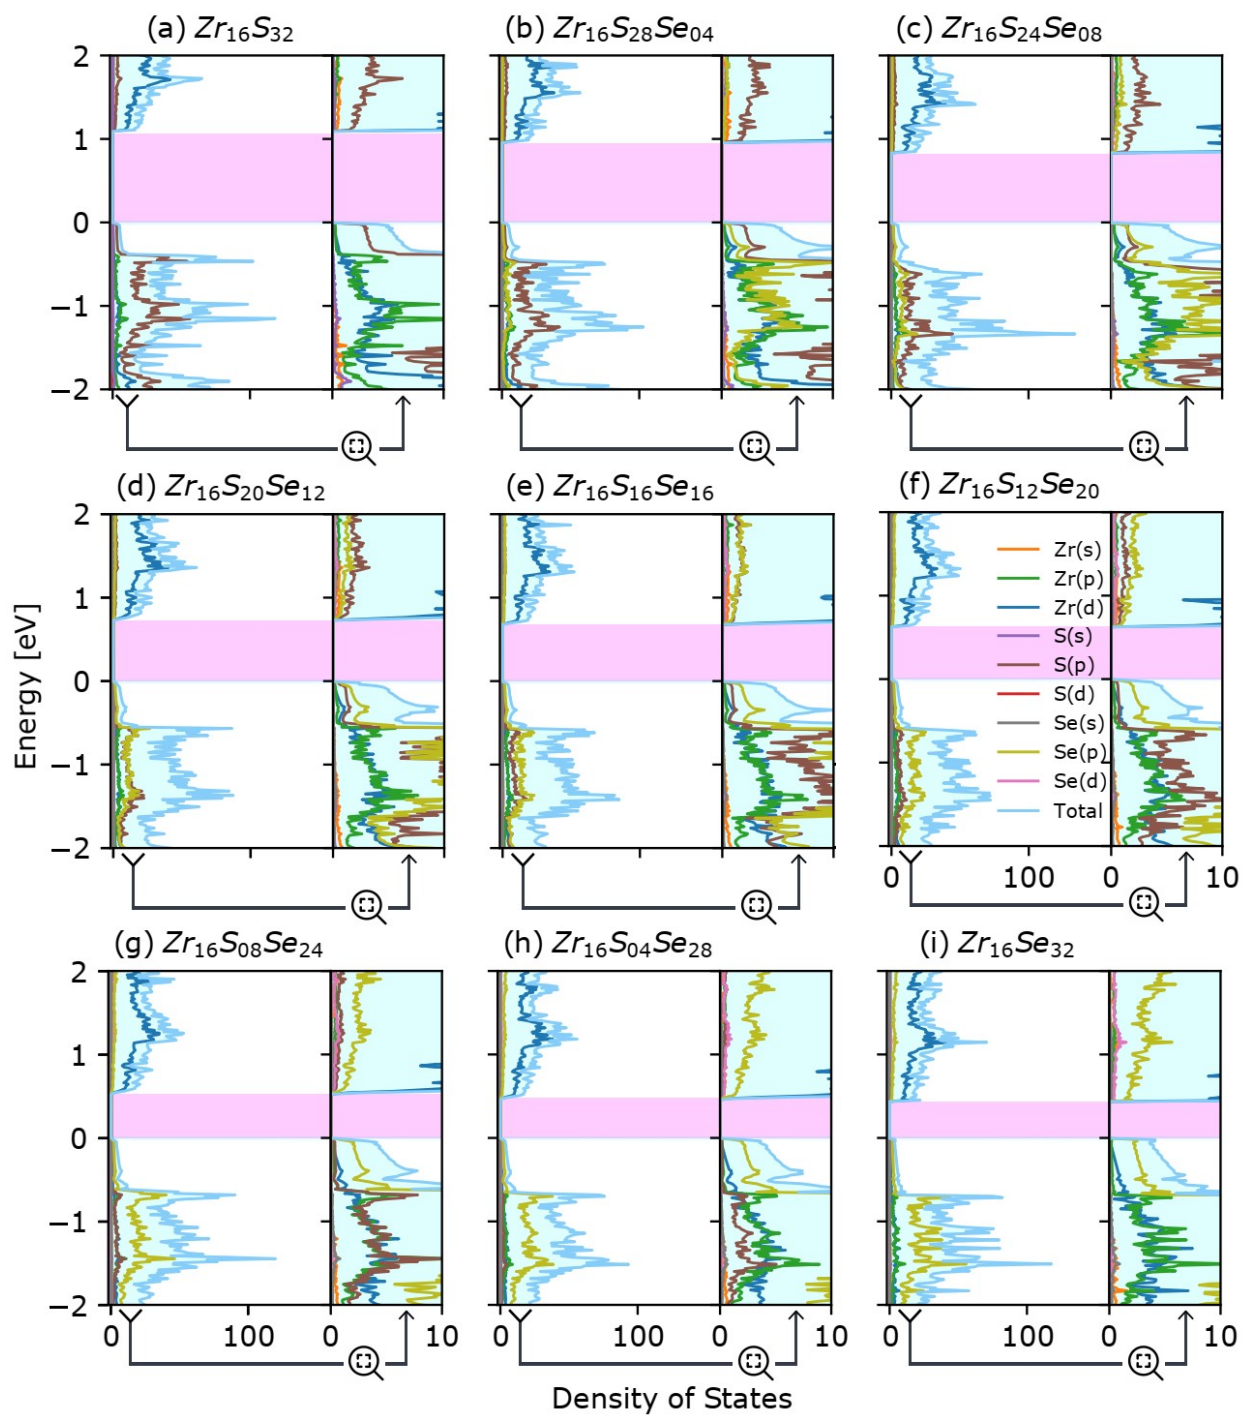

Fig. S4 The total and partial density of states (DOS) of (a)  $Zr_{16}S_{32}$  (b)  $Zr_{16}S_{28}Se_4$  (c)  $Zr_{16}S_{24}Se_8$  (d)  $Zr_{16}S_{20}Se_{12}$  (e)  $Zr_{16}S_{16}Se_{16}$  (f)  $Zr_{16}S_{12}Se_{20}$  (g)  $Zr_{16}S_8Se_{24}$  (h)  $Zr_{16}S_4Se_{28}$  (i)  $Zr_{16}Se_{32}$ .
